# Supplementary material
Source: PubMed Central journal article supplement (PMC6138545)
Supplement: NIHMS952193-supplement-2.pdf [file NIHMS952193-supplement-2.pdf]

**A**

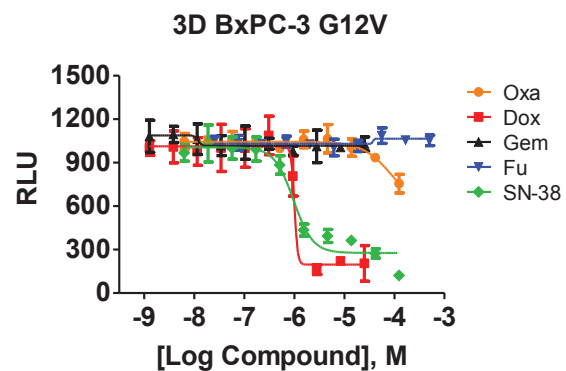

|           | Oxa        | Dox          | Gem          | Fu           | SN-38      |
|-----------|------------|--------------|--------------|--------------|------------|
| HillSlope | -1.479     | ~ -13.76     | ~ -13.23     | ~ 86.94      | -2.272     |
| IC50      | 9.116e-005 | ~ 1.003e-006 | ~ 1.192e-008 | ~ 3.730e-005 | 9.626e-007 |

**B**

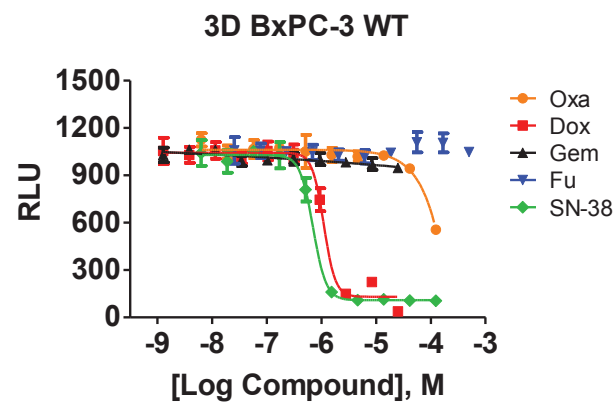

|           | Oxa        | Dox        | Gem          | Fu | SN-38      |
|-----------|------------|------------|--------------|----|------------|
| HillSlope | -1.239     | -4.151     | ~ -0.07697   |    | -3.653     |
| IC50      | ~ 0.009993 | 1.104e-006 | ~ 4.324e+007 |    | 7.020e-007 |

**C**

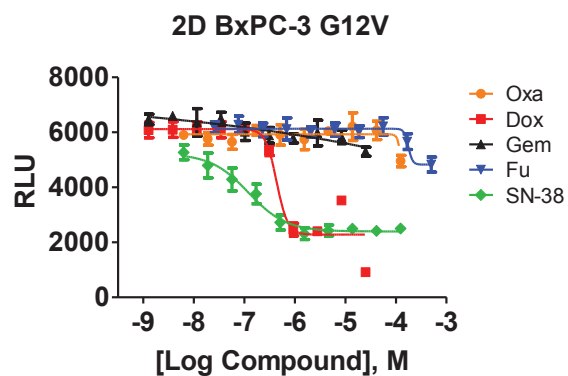

|           | Oxa         | Dox        | Gem          | Fu          | SN-38      |
|-----------|-------------|------------|--------------|-------------|------------|
| HillSlope | ~ -12.43    | -3.964     | ~ -0.08501   | ~ -10.71    | -1.166     |
| IC50      | ~ 0.0001438 | 4.360e-007 | ~ 1.071e+012 | ~ 0.0001761 | 1.205e-007 |

**D**

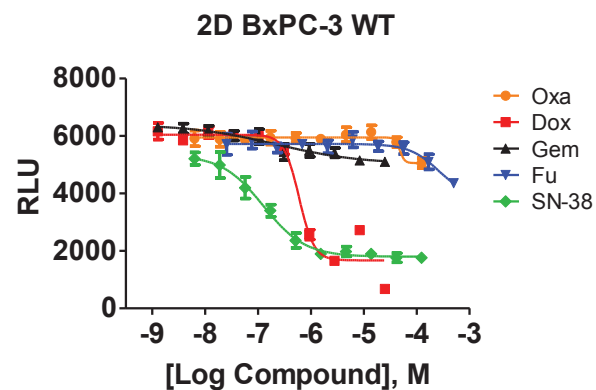

|           | Oxa          | Dox        | Gem        | Fu        | SN-38      |
|-----------|--------------|------------|------------|-----------|------------|
| HillSlope | ~ -10.03     | -3.073     | -0.5350    | -1.577    | -1.106     |
| IC50      | ~ 4.804e-005 | 5.970e-007 | 2.161e-007 | 0.0002545 | 1.264e-007 |
