# Supplementary material
Source: PubMed Central journal article supplement (PMC6138545)

**A**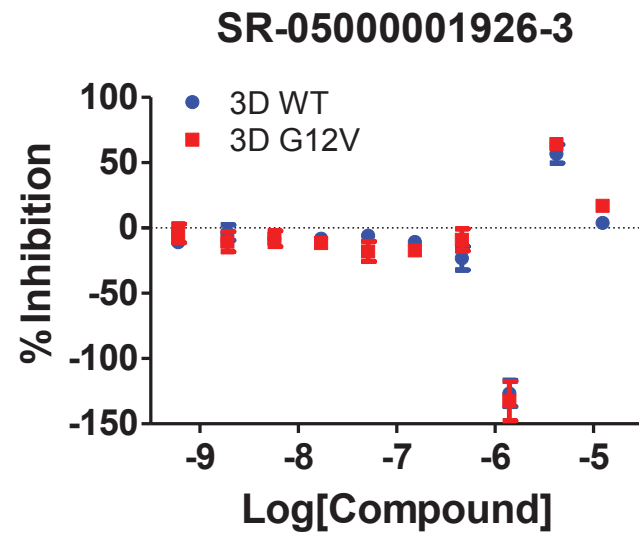**B**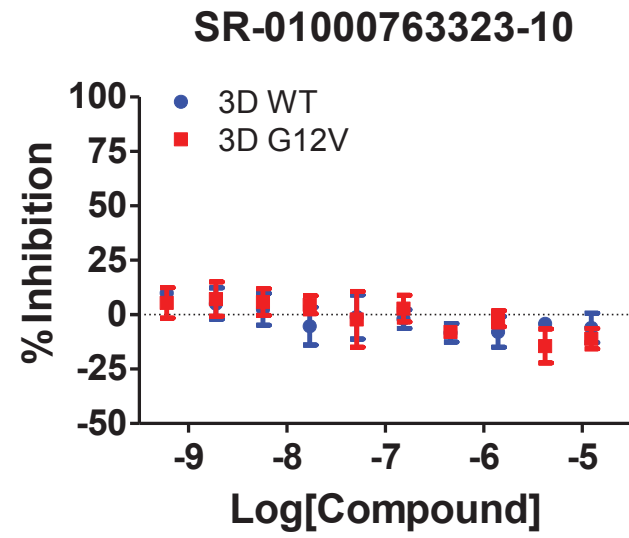

Supplement: NIHMS952193-supplement-3.pdf [file NIHMS952193-supplement-3.pdf]
